# Supplementary material for: Comprehensive Assessment of the Multi-cropping Effect on the Agroecosystems
Source: Preprints.org preprint supplement (doi:10.20944/preprints202403.1814.v1), 2024-03-29

**Table S1.** Example of CEI calculations of Level 1: Soil aggregate stability, divided into the stages

| Stage                                                                                                                                                                                                                                                                                                                                                                                                                                                                                                                                                                                                                       | Example                                                                                                                                                                                                                                                                                                                                                                                                                                                                                                                                                                                                                                                                                                                                                                                                     |                                                           |      |      |      |      |   |   |   |                            |  |  |   |   |   |   |           |    |    |    |    |                                                                                |  |      |  |  |  |  |  |                                    |  |         |      |   |     |   |   |      |     |     |     |      |      |     |      |      |     |     |      |    |  |      |      |      |      |      |      |  |  |  |  |         |      |      |      |      |      |  |  |  |  |
|-----------------------------------------------------------------------------------------------------------------------------------------------------------------------------------------------------------------------------------------------------------------------------------------------------------------------------------------------------------------------------------------------------------------------------------------------------------------------------------------------------------------------------------------------------------------------------------------------------------------------------|-------------------------------------------------------------------------------------------------------------------------------------------------------------------------------------------------------------------------------------------------------------------------------------------------------------------------------------------------------------------------------------------------------------------------------------------------------------------------------------------------------------------------------------------------------------------------------------------------------------------------------------------------------------------------------------------------------------------------------------------------------------------------------------------------------------|-----------------------------------------------------------|------|------|------|------|---|---|---|----------------------------|--|--|---|---|---|---|-----------|----|----|----|----|--------------------------------------------------------------------------------|--|------|--|--|--|--|--|------------------------------------|--|---------|------|---|-----|---|---|------|-----|-----|-----|------|------|-----|------|------|-----|-----|------|----|--|------|------|------|------|------|------|--|--|--|--|---------|------|------|------|------|------|--|--|--|--|
| 1) The values of the different indicators are determined (for example, volume precrop residues). Exell platform was used.                                                                                                                                                                                                                                                                                                                                                                                                                                                                                                   | <table><tr><td colspan="7">1) The values of the different indicators were determined</td></tr><tr><td></td><td colspan="5">I Soil aggregate stability</td><td></td></tr><tr><td></td><td>Treatmens</td><td>DP</td><td>SP</td><td>DC</td><td>SC</td><td>NT</td></tr><tr><td></td><td>Year</td><td></td><td></td><td></td><td></td><td></td></tr><tr><td>Precrop residues (after sowing), %</td><td></td><td></td><td></td><td></td><td></td><td></td></tr><tr><td></td><td>2016</td><td>0,5</td><td>0,3</td><td>8,5</td><td>10,5</td><td>82,8</td></tr><tr><td></td><td>2017</td><td>1,3</td><td>1,3</td><td>7,3</td><td>11,8</td><td>22</td></tr><tr><td></td><td>2018</td><td>0,8</td><td>4,2</td><td>36,8</td><td>25,8</td><td>54,2</td></tr></table>                                                     | 1) The values of the different indicators were determined |      |      |      |      |   |   |   | I Soil aggregate stability |  |  |   |   |   |   | Treatmens | DP | SP | DC | SC | NT                                                                             |  | Year |  |  |  |  |  | Precrop residues (after sowing), % |  |         |      |   |     |   |   | 2016 | 0,5 | 0,3 | 8,5 | 10,5 | 82,8 |     | 2017 | 1,3  | 1,3 | 7,3 | 11,8 | 22 |  | 2018 | 0,8  | 4,2  | 36,8 | 25,8 | 54,2 |  |  |  |  |         |      |      |      |      |      |  |  |  |  |
| 1) The values of the different indicators were determined                                                                                                                                                                                                                                                                                                                                                                                                                                                                                                                                                                   |                                                                                                                                                                                                                                                                                                                                                                                                                                                                                                                                                                                                                                                                                                                                                                                                             |                                                           |      |      |      |      |   |   |   |                            |  |  |   |   |   |   |           |    |    |    |    |                                                                                |  |      |  |  |  |  |  |                                    |  |         |      |   |     |   |   |      |     |     |     |      |      |     |      |      |     |     |      |    |  |      |      |      |      |      |      |  |  |  |  |         |      |      |      |      |      |  |  |  |  |
|                                                                                                                                                                                                                                                                                                                                                                                                                                                                                                                                                                                                                             | I Soil aggregate stability                                                                                                                                                                                                                                                                                                                                                                                                                                                                                                                                                                                                                                                                                                                                                                                  |                                                           |      |      |      |      |   |   |   |                            |  |  |   |   |   |   |           |    |    |    |    |                                                                                |  |      |  |  |  |  |  |                                    |  |         |      |   |     |   |   |      |     |     |     |      |      |     |      |      |     |     |      |    |  |      |      |      |      |      |      |  |  |  |  |         |      |      |      |      |      |  |  |  |  |
|                                                                                                                                                                                                                                                                                                                                                                                                                                                                                                                                                                                                                             | Treatmens                                                                                                                                                                                                                                                                                                                                                                                                                                                                                                                                                                                                                                                                                                                                                                                                   | DP                                                        | SP   | DC   | SC   | NT   |   |   |   |                            |  |  |   |   |   |   |           |    |    |    |    |                                                                                |  |      |  |  |  |  |  |                                    |  |         |      |   |     |   |   |      |     |     |     |      |      |     |      |      |     |     |      |    |  |      |      |      |      |      |      |  |  |  |  |         |      |      |      |      |      |  |  |  |  |
|                                                                                                                                                                                                                                                                                                                                                                                                                                                                                                                                                                                                                             | Year                                                                                                                                                                                                                                                                                                                                                                                                                                                                                                                                                                                                                                                                                                                                                                                                        |                                                           |      |      |      |      |   |   |   |                            |  |  |   |   |   |   |           |    |    |    |    |                                                                                |  |      |  |  |  |  |  |                                    |  |         |      |   |     |   |   |      |     |     |     |      |      |     |      |      |     |     |      |    |  |      |      |      |      |      |      |  |  |  |  |         |      |      |      |      |      |  |  |  |  |
| Precrop residues (after sowing), %                                                                                                                                                                                                                                                                                                                                                                                                                                                                                                                                                                                          |                                                                                                                                                                                                                                                                                                                                                                                                                                                                                                                                                                                                                                                                                                                                                                                                             |                                                           |      |      |      |      |   |   |   |                            |  |  |   |   |   |   |           |    |    |    |    |                                                                                |  |      |  |  |  |  |  |                                    |  |         |      |   |     |   |   |      |     |     |     |      |      |     |      |      |     |     |      |    |  |      |      |      |      |      |      |  |  |  |  |         |      |      |      |      |      |  |  |  |  |
|                                                                                                                                                                                                                                                                                                                                                                                                                                                                                                                                                                                                                             | 2016                                                                                                                                                                                                                                                                                                                                                                                                                                                                                                                                                                                                                                                                                                                                                                                                        | 0,5                                                       | 0,3  | 8,5  | 10,5 | 82,8 |   |   |   |                            |  |  |   |   |   |   |           |    |    |    |    |                                                                                |  |      |  |  |  |  |  |                                    |  |         |      |   |     |   |   |      |     |     |     |      |      |     |      |      |     |     |      |    |  |      |      |      |      |      |      |  |  |  |  |         |      |      |      |      |      |  |  |  |  |
|                                                                                                                                                                                                                                                                                                                                                                                                                                                                                                                                                                                                                             | 2017                                                                                                                                                                                                                                                                                                                                                                                                                                                                                                                                                                                                                                                                                                                                                                                                        | 1,3                                                       | 1,3  | 7,3  | 11,8 | 22   |   |   |   |                            |  |  |   |   |   |   |           |    |    |    |    |                                                                                |  |      |  |  |  |  |  |                                    |  |         |      |   |     |   |   |      |     |     |     |      |      |     |      |      |     |     |      |    |  |      |      |      |      |      |      |  |  |  |  |         |      |      |      |      |      |  |  |  |  |
|                                                                                                                                                                                                                                                                                                                                                                                                                                                                                                                                                                                                                             | 2018                                                                                                                                                                                                                                                                                                                                                                                                                                                                                                                                                                                                                                                                                                                                                                                                        | 0,8                                                       | 4,2  | 36,8 | 25,8 | 54,2 |   |   |   |                            |  |  |   |   |   |   |           |    |    |    |    |                                                                                |  |      |  |  |  |  |  |                                    |  |         |      |   |     |   |   |      |     |     |     |      |      |     |      |      |     |     |      |    |  |      |      |      |      |      |      |  |  |  |  |         |      |      |      |      |      |  |  |  |  |
| 2) The real values of each indicator are converted to a uniform 9-point scale. A score of 1 corresponds to the worst or minimum value, and 9 – to the best or highest value. For all other values of the same indicator, the scores are calculated according to the following formula: $VB_i=(X_i-X_{min}) / (X_{max}-X_{min})^{-1}\times 8+1$ where: VB <sub>i</sub> is the score for a value of a given indicator, X <sub>i</sub> is the expression for a given value, X <sub>max</sub> is the maximum value for a given indicator, X <sub>min</sub> is the minimum value for a given indicator. Exell platform was used. | <table><tr><td colspan="10"><math>= (0,5-0,3)/(82,8-0,3)*8+1</math></td></tr><tr><td></td><td>D</td><td>E</td><td>F</td><td>G</td><td>H</td><td>I</td><td>J</td><td>K</td><td>L</td></tr><tr><td colspan="10">2) The real values of each indicator were converted to a uniform 9-point scale</td></tr><tr><td>Formula</td><td>1,02</td><td>1</td><td>1,8</td><td>2</td><td>9</td><td></td><td></td><td></td><td></td></tr><tr><td></td><td>1,1</td><td>1,1</td><td>1,68</td><td>2,12</td><td>3,1</td><td></td><td></td><td></td><td></td></tr><tr><td></td><td>1,05</td><td>1,38</td><td>4,54</td><td>3,47</td><td>6,23</td><td></td><td></td><td></td><td></td></tr><tr><td>Average</td><td>1,06</td><td>1,16</td><td>2,67</td><td>2,53</td><td>6,11</td><td></td><td></td><td></td><td></td></tr></table> | $= (0,5-0,3)/(82,8-0,3)*8+1$                              |      |      |      |      |   |   |   |                            |  |  | D | E | F | G | H         | I  | J  | K  | L  | 2) The real values of each indicator were converted to a uniform 9-point scale |  |      |  |  |  |  |  |                                    |  | Formula | 1,02 | 1 | 1,8 | 2 | 9 |      |     |     |     |      | 1,1  | 1,1 | 1,68 | 2,12 | 3,1 |     |      |    |  |      | 1,05 | 1,38 | 4,54 | 3,47 | 6,23 |  |  |  |  | Average | 1,06 | 1,16 | 2,67 | 2,53 | 6,11 |  |  |  |  |
| $= (0,5-0,3)/(82,8-0,3)*8+1$                                                                                                                                                                                                                                                                                                                                                                                                                                                                                                                                                                                                |                                                                                                                                                                                                                                                                                                                                                                                                                                                                                                                                                                                                                                                                                                                                                                                                             |                                                           |      |      |      |      |   |   |   |                            |  |  |   |   |   |   |           |    |    |    |    |                                                                                |  |      |  |  |  |  |  |                                    |  |         |      |   |     |   |   |      |     |     |     |      |      |     |      |      |     |     |      |    |  |      |      |      |      |      |      |  |  |  |  |         |      |      |      |      |      |  |  |  |  |
|                                                                                                                                                                                                                                                                                                                                                                                                                                                                                                                                                                                                                             | D                                                                                                                                                                                                                                                                                                                                                                                                                                                                                                                                                                                                                                                                                                                                                                                                           | E                                                         | F    | G    | H    | I    | J | K | L |                            |  |  |   |   |   |   |           |    |    |    |    |                                                                                |  |      |  |  |  |  |  |                                    |  |         |      |   |     |   |   |      |     |     |     |      |      |     |      |      |     |     |      |    |  |      |      |      |      |      |      |  |  |  |  |         |      |      |      |      |      |  |  |  |  |
| 2) The real values of each indicator were converted to a uniform 9-point scale                                                                                                                                                                                                                                                                                                                                                                                                                                                                                                                                              |                                                                                                                                                                                                                                                                                                                                                                                                                                                                                                                                                                                                                                                                                                                                                                                                             |                                                           |      |      |      |      |   |   |   |                            |  |  |   |   |   |   |           |    |    |    |    |                                                                                |  |      |  |  |  |  |  |                                    |  |         |      |   |     |   |   |      |     |     |     |      |      |     |      |      |     |     |      |    |  |      |      |      |      |      |      |  |  |  |  |         |      |      |      |      |      |  |  |  |  |
| Formula                                                                                                                                                                                                                                                                                                                                                                                                                                                                                                                                                                                                                     | 1,02                                                                                                                                                                                                                                                                                                                                                                                                                                                                                                                                                                                                                                                                                                                                                                                                        | 1                                                         | 1,8  | 2    | 9    |      |   |   |   |                            |  |  |   |   |   |   |           |    |    |    |    |                                                                                |  |      |  |  |  |  |  |                                    |  |         |      |   |     |   |   |      |     |     |     |      |      |     |      |      |     |     |      |    |  |      |      |      |      |      |      |  |  |  |  |         |      |      |      |      |      |  |  |  |  |
|                                                                                                                                                                                                                                                                                                                                                                                                                                                                                                                                                                                                                             | 1,1                                                                                                                                                                                                                                                                                                                                                                                                                                                                                                                                                                                                                                                                                                                                                                                                         | 1,1                                                       | 1,68 | 2,12 | 3,1  |      |   |   |   |                            |  |  |   |   |   |   |           |    |    |    |    |                                                                                |  |      |  |  |  |  |  |                                    |  |         |      |   |     |   |   |      |     |     |     |      |      |     |      |      |     |     |      |    |  |      |      |      |      |      |      |  |  |  |  |         |      |      |      |      |      |  |  |  |  |
|                                                                                                                                                                                                                                                                                                                                                                                                                                                                                                                                                                                                                             | 1,05                                                                                                                                                                                                                                                                                                                                                                                                                                                                                                                                                                                                                                                                                                                                                                                                        | 1,38                                                      | 4,54 | 3,47 | 6,23 |      |   |   |   |                            |  |  |   |   |   |   |           |    |    |    |    |                                                                                |  |      |  |  |  |  |  |                                    |  |         |      |   |     |   |   |      |     |     |     |      |      |     |      |      |     |     |      |    |  |      |      |      |      |      |      |  |  |  |  |         |      |      |      |      |      |  |  |  |  |
| Average                                                                                                                                                                                                                                                                                                                                                                                                                                                                                                                                                                                                                     | 1,06                                                                                                                                                                                                                                                                                                                                                                                                                                                                                                                                                                                                                                                                                                                                                                                                        | 1,16                                                      | 2,67 | 2,53 | 6,11 |      |   |   |   |                            |  |  |   |   |   |   |           |    |    |    |    |                                                                                |  |      |  |  |  |  |  |                                    |  |         |      |   |     |   |   |      |     |     |     |      |      |     |      |      |     |     |      |    |  |      |      |      |      |      |      |  |  |  |  |         |      |      |      |      |      |  |  |  |  |

3) The indicators converted to scores are shown in grid diagrams with a radius from 1 to 9. Exell platform was used.

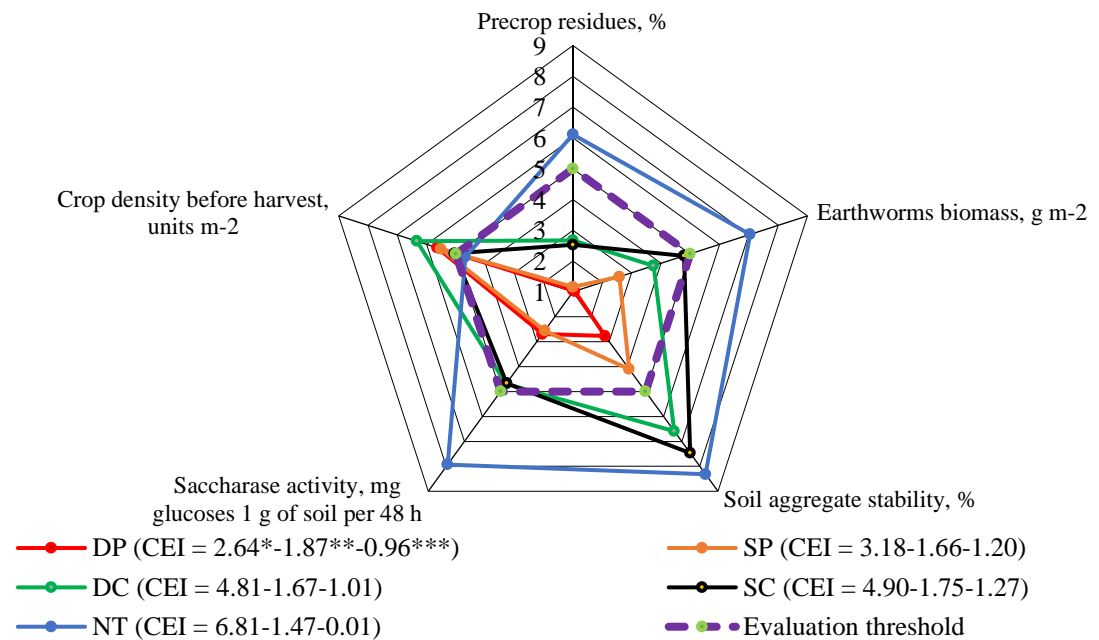

4) The scale also shows the average value of the individual indicators – the score threshold – which is equal to 5 points, and which distinguishes between the high and the low scores. The effectiveness of the measure (marked with \*) is indicated by the area bounded by the scores of all its indicators. CEI data was calculated in Stage 5.

|                                                       | DP (CEI = 2.64*-1.87**-0.96***) | SP (CEI = 3.18-1.66-1.20) | DC (CEI = 4.81-1.67-1.01) | SC (CEI = 4.90-1.75-1.27) | NT (CEI = 6.81-1.47-0.01) | Evaluation threshold |
|-------------------------------------------------------|---------------------------------|---------------------------|---------------------------|---------------------------|---------------------------|----------------------|
| Precrop residues, %                                   | 1.06                            | 1.16                      | 2.67                      | 2.53                      | 6.11                      | 5.00                 |
| Earthworms' biomass, g m <sup>-2</sup>                | 1.06                            | 2.59                      | 3.75                      | 4.79                      | 7.04                      | 5.00                 |
| Soil aggregate stability, %                           | 2.77                            | 4.10                      | 6.59                      | 7.47                      | 8.32                      | 5.00                 |
| Saccharase activity, mg glucoses 1 g of soil per 48 h | 2.69                            | 2.56                      | 4.70                      | 4.66                      | 7.93                      | 5.00                 |
| Crop density before harvest, units m <sup>-2</sup>    | 5.63                            | 5.51                      | 6.33                      | 5.05                      | 4.68                      | 5.00                 |

5) The calculation of the complex evaluation index (CEI), which consists of the average of the evaluation scores (\*-EP), the standard deviation of the evaluation scores (\*\*-EP) and the standard deviation of the average of the evaluation scores below the evaluation threshold (\*\*).

CEI and EP calculations were performed by the computer program STAT\_ENG in SELEKCIJA software (vers. 5.00, author dr. Pavelas Tarakanovas, Lithuanian Institute of Agriculture, Akademija, Kedainiu distr., Lithuania) was applied. This data was included in the figure legend.

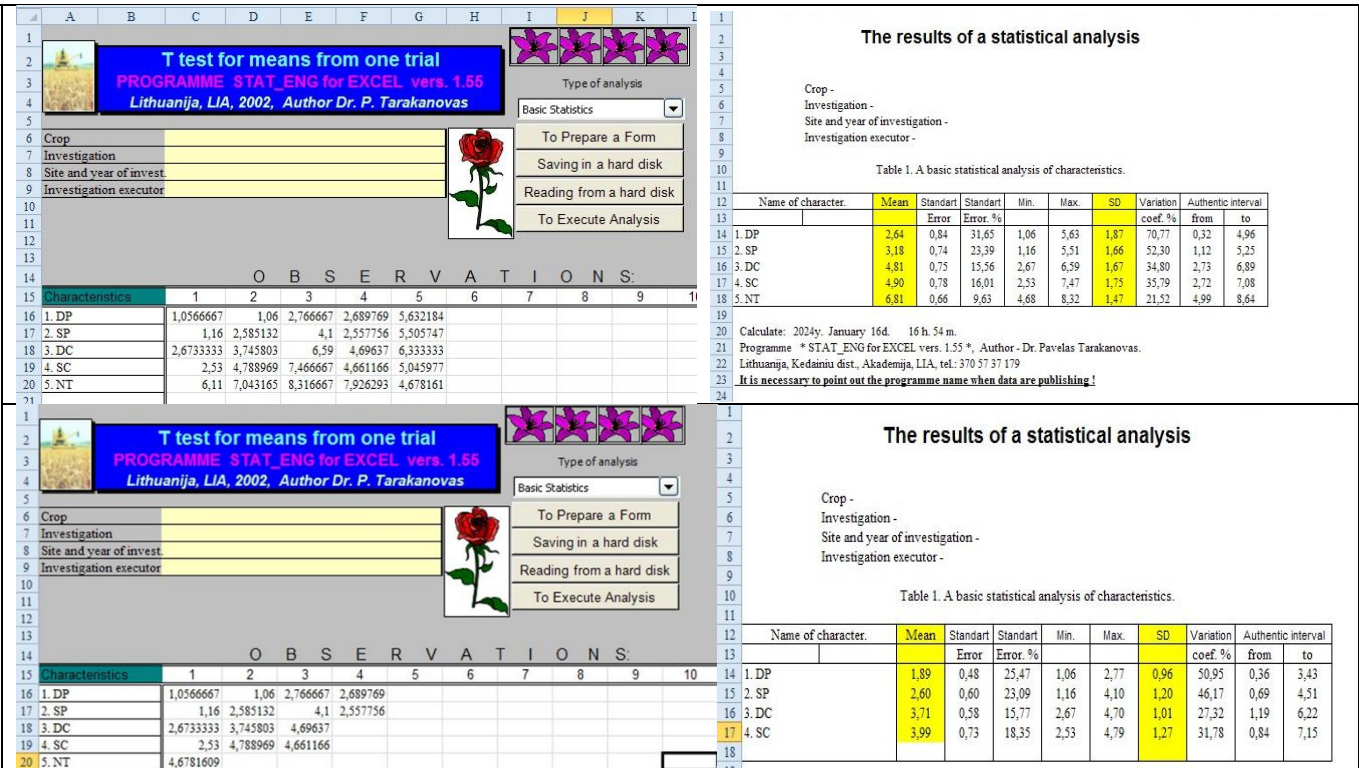

Supplement: Supplementary file 1 [file supplementary]
